# Supplementary material
Source: Research Square preprint supplement (doi:10.21203/rs.3.rs-8856470/v2)
Supplement: Supplementary file 1 [file ba5b378d498742d635405b43.pdf]

# Supplementary Material for: Evaluation Criteria for AI-Assisted Product Carbon Footprinting Systems: The Cases of Mapping and Supply Chain Modeling

Online Resource 2: EPD Validation Dataset

Shaena Ulissi<sup>1\*</sup>    Andrew Dumit<sup>1</sup>    P. James Joyce<sup>1</sup>    Jacob Feintzeig<sup>1</sup>  
Krishna Rao<sup>1</sup>    Steven Watson<sup>1</sup>    Sangwon Suh<sup>1\*</sup>

April 2026

<sup>1</sup>Watershed Technology Inc., San Francisco, CA, USA

\*Corresponding authors: [shaena@watershedclimate.com](mailto:shaena@watershedclimate.com); [sangwon@tsinghua.edu.cn](mailto:sangwon@tsinghua.edu.cn)

## Overview

This document summarizes the 269 Environmental Product Declarations (EPDs) used for end-to-end benchmarking of the Advanced Modeling System (Case 2) in the main paper. EPDs were sourced primarily from EPD International and represent a diverse range of product categories. All EPDs have a declared unit that can be converted to 1 kg or 1 unit.

Table OR2.1: Distribution of EPDs by product category

| <b>Category</b>                          | <b>Count</b> |
|------------------------------------------|--------------|
| Food & beverages                         | 73           |
| Chemical products                        | 63           |
| Metal, mineral, plastic & glass products | 56           |
| Textiles, footwear & apparel             | 16           |
| Construction products                    | 13           |
| Paper & plastic products                 | 13           |
| Vehicles & transport equipment           | 13           |
| Machinery & equipment                    | 12           |
| Furniture & other goods                  | 10           |
| <b>Total</b>                             | <b>269</b>   |
